# Supplementary material for: Quartz under stress: Raman calibration and applications to geobarometry of metamorphic inclusions
Source: Copernicus journal article supplement (doi:10.5194/egusphere-2023-100), 2023-02-08
Supplement: Supplementary file 2 [file SOM_Sheet.xlsx]

## Sheet: This study
successful experiments
compression perpendicular to c-axis								compression parallel to c-axis							hydrostatic compression							Natural inclusions
																						remeasured from Zhong et al. (2019)
stress (MPa)		128 TO	128 LO	206	464			stress (MPa)		128	206	464			P (GPa)		128	206	464
																						128	206	464
0		127.96		206	463.96			0		128	206.06	464.04			0.0001		128	206	464
0			128.04	206.01	464.04			0		127.93	205.94	463.97			1.764		137.89	241.75	478.9			130.73	216.78	467.74
66.929			128.09	206.4	464.03			0		128.08	206.11	464.1			1.4907		136.74	237.77	476.82			131.45	219.03	469.4
66.929			128.14	206.6	464.04			63.107		128.23	206.87	464.44			1.3027		135.81	234.61	475.31			130.66	216.15	467.95
106.3			128.35	207.25	464.22			111.65		128.27	207.35	464.69			1.1107		134.86	231.16	473.71			129.87	216.61	467.95
106.3			128.37	207.09	464.15			160.19		128.29	207.8	464.9			0.92		133.94	227.73	472.23			129.62	217.71	467.98
145.67			128.36	207.21	464.23			208.74		128.32	208.15	465.04			0.628		132.2	221.69	469.69			131.69	217.2	468.2
145.67			128.54	207.58	464.26			257.28		128.4	208.89	465.4			0.62933		132.18	221.62	469.69			131.14	215.48	467.6
185.04		128.03	128.75	207.49	464.25			305.83		128.36	209.2	465.6			0.0001		127.93	205.98	463.96			129.64	216.67	467.94
185.04		127.86	128.74	207.67	464.3			354.37		128.43	209.79	465.87			0.40267		130.8	216.46	467.7			130.86	215.54	467.25
224.41		127.98	129.05	207.93	464.37			402.91		128.56	210.41	466.21			0.19733		129.37	211.17	465.79			130.02	218.13	468.24
263.78		127.83	129.27	208.33	464.47			451.46		128.63	210.98	466.47			0.0001		127.99	205.98	464.05			130.3	214.28	466.88
263.78		127.89	129.22	208.42	464.5			500		128.64	211.52	466.72			0.22		129.4	211.53	465.87
303.15		127.9	129.36	208.59	464.56			548.54		128.68	211.92	466.95			0.40133		130.84	216.49	467.71
303.15		127.98	129.42	208.67	464.53			597.09		128.69	212.4	467.17			0.584		131.8	220.22	469.12
342.52		127.95	129.8	209.38	464.8			645.63		128.81	213.28	467.61			0.744		132.8	223.82	470.56
342.52		127.9	129.75	209.5	464.77			0		127.97	206.05	464.01			1.584		137.04	238.85	477.35
381.89		127.96	129.96	209.7	464.88										1.9347		138.63	244.2	480.22
381.89		127.95	130	209.83	464.85										0.77733		132.98	224.7	470.84
421.26		127.91	130.25	210.28	464.95
460.63		127.98	130.44	210.51	465.12
460.63		128.18	130.54	210.71	465.09			5.848		128	206.05	464.03
500		127.95	130.72	211.06	465.2			29.24		128.03	206.3	464.16
539.37		128.08	130.89	211.36	465.34			73.099		128.09	207.01	464.49
578.74		128.06	131.22	212	465.48			116.96		128.17	207.56	464.75
578.74		128.23	131.41	212.14	465.55			160.82		128.2	207.94	464.93
578.74		128.36	132.83	212.99	465.8	crack initiation		204.68		128.21	208.27	465.06
								244.15		128.29	208.69	465.32
								263.16		128.3	208.96	465.48
1.6367		128.01		206	464.03
14.73		128.14		206.32	464.11
0		127.99		206.02	463.98
14.73			128.12	206.27	464.01
31.097			128.25	206.41	464.03
47.463			128.33	206.62	464.09
63.83			128.45	206.81	464.15
80.196			128.5	207.01	464.19
96.563			128.58	207.22	464.24
112.93			128.7	207.39	464.3
129.3			128.79	207.57	464.35
145.66			128.88	207.74	464.39
162.03			128.96	207.94	464.44
162.03			129.05	207.94	464.45
178.4			129.14	208.09	464.46
194.76			129.24	208.27	464.52
211.13			129.28	208.4	464.58
227.5			129.36	208.57	464.61
243.86			129.46	208.76	464.66
260.23			129.53	208.91	464.7
276.6			129.62	209.01	464.72
297.87				209.24	464.8
307.69			129.79	209.39	464.83
325.7			129.6	209.51	464.8
0				206.08	464.06
0				205.88	463.97
617.94				213.94	466.21
failed experiment: immediate cracking of the crystal, the stress cannot be calculated because the effective section of the crystal is unknown
Force (N)
polarization 0°
24				206.05	464
20				205.96	463.99
100				206.33	464.09
100				206.4	464.08
200				206.68	464.07
300			128.46	206.95	464.12
400			128.62	207.19	464.2
500			128.81	207.47	464.33
600			128.92	207.7	464.38
24		127.99		206	463.93
24		128.01		206.11	464.01
500			128.8	207.57	464.35
700			128.99	207.96	464.46
800			129.07	208.08	464.47
900			129.23	208.3	464.56
1000			129.3	208.45	464.61
1100			129.36	208.63	464.63
1200			129.44	208.81	464.68
1300			129.58	209.01	464.76
1400			129.6	209.1	464.7
1500				209.37	464.82
1600			129.89	209.56	464.9
1700			130	209.72	464.95
1800			130.15	209.88	464.99
1900			130.24	210.19	465.11
2000			130.24	210.14	465.1
2100			130.34	210.35	465.14
2200		128.1	130.61	210.7	465.25
2300			130.73	211.03	465.32
2350		128.45	131.11	211.56	465.5
2450		128.04	131.44	212.19	465.69
2450		128.13	131.58	212.46	465.76
24				205.89	463.99
polarization 90°
200		127.77		206.78	464.25
300		127.67	128.57	207.07	464.33
400		128.03	128.77	207.31	464.38
500		127.78	128.77	207.47	464.43
600		127.89	128.88	207.68	464.47
24		128.03		206	464
24		128.02		206.07	464
500		128.22	128.93	207.57	464.4
700		127.97	129.03	207.93	464.48
800		128.01	129.1	208.06	464.49
900				208.41	464.57
1000		127.97	129.27	208.41	464.63
1100		128.2	129.51	208.59	464.65
1200		128.13	129.56	208.78	464.7
1300		128.14	129.68	208.96	464.76
1400				209.07	464.73
1500		128.11	129.85	209.33	464.85
1600		128.18	130.03	209.55	464.92
1700		128.13	130.12	209.68	464.97
1800		128.05	130.21	209.86	465.01
1900		128.08	130.23	210.22	465.13
2000		128.15	130.22	210.09	465.1
2100		128.22	130.46	210.33	465.15
2200		128.22	130.61	210.63	465.23
2300		128.38	131.27	211.04	465.34
2300		128.41	131.04	211.2	465.43
2350		128.44	131.05	211.47	465.52
2350		128.42	131.25	211.58	465.53
2370		128.43	131.32	211.71	465.56
2390		128.45	131.42	211.82	465.59
2410		128.51	131.48	211.93	465.65
2430		128.46	131.49	211.97	465.63
2450		128.43	131.49	212.03	465.64
2450		128.56	132.97	214.55	466.42
24		127.99		205.93	464.01

## Sheet: Literature data
Experimental inclusions
Bonazzi et al. 2019		selected and rejected data based on optical and textural criteria defined in the publication
Measured values				Date	Measured standard				Corrected values
P=2.5 GPa selected
132.9	227.45	472.06		2018-07-12	127.87	206.88	464.78		133.03	226.57	471.28
132.04	226.11	471.5		2018-08-12	127.87	206.88	464.78		132.17	225.23	470.72
132.7	226.97	471.67		2018-09-12	127.87	206.88	464.78		132.83	226.09	470.89
131.74	225.77	471.42		6/13/18	126.65	205.32	463.48		133.09	226.45	471.94
132.64	227.59	472.47		2018-05-12	127.87	206.88	464.78		132.77	226.71	471.69
132.61	227.46	472.38		2018-05-12	127.87	206.88	464.78		132.74	226.58	471.6
132.72	224.33	471.42		2018-07-12	127.87	206.88	464.78		132.85	223.45	470.64
132.85	226.77	472.32		2018-07-12	127.87	206.88	464.78		132.98	225.89	471.54
132.99	226.38	472.17		2018-07-12	127.87	206.88	464.78		133.12	225.5	471.39
132.54	226.16	471.58		2018-05-12	127.87	206.88	464.78		132.67	225.28	470.8
132.51	225.82	471.58		2018-07-12	127.87	206.88	464.78		132.64	224.94	470.8
130.95	225.83	471.04		6/13/18	126.65	205.32	463.48		132.3	226.51	471.56
132.2	225.67	471.78		11/22/18	127.97	207.31	464.79		132.23	224.36	470.99
133.25	227.86	472.73		11/22/18	127.97	207.31	464.79		133.28	226.55	471.94
132.42	226.67	471.81		11/22/18	127.97	207.31	464.79		132.45	225.36	471.02
133.33	228.16	472.78		11/22/18	127.97	207.31	464.79		133.36	226.85	471.99
P=2.5 GPa rejected
131.49	225.52	471.41		6/13/18	126.65	205.32	463.48		132.84	226.2	471.93
130.99	220.82	469.68		6/13/18	126.65	205.32	463.48		132.34	221.5	470.2
133.5	228.92	473.51		2018-07-12	127.87	206.88	464.78		133.63	228.04	472.73
133.35	229.04	472.94		2018-05-12	127.87	206.88	464.78		133.48	228.16	472.16
132.84	229.07	473.49		11/22/18	127.97	207.31	464.79		132.87	227.76	472.7
133.38	229.38	473.2		11/22/18	127.97	207.31	464.79		133.41	228.07	472.41
133.46	228.52	473.01		11/22/18	127.97	207.31	464.79		133.49	227.21	472.22
133.03	228.54	472.96		11/22/18	127.97	207.31	464.79		133.06	227.23	472.17
P=3 GPa selected
134.25	231.46	474.6		2018-05-12	127.62	206.95	464.7		134.63	230.51	473.9
133.64	231.09	474.43		2018-12-06	127.24	205.96	464.07		134.4	231.13	474.36
129.31	225.79	467.79		2018-12-06	127.24	205.96	464.07		130.07	225.83	467.72
134.49	232.69	474.85		2018-12-06	127.24	205.96	464.07		135.25	232.73	474.78
134.29	232.96	474.68		2018-12-06	127.24	205.96	464.07		135.05	233	474.61
132.73	229.99	470.7		2018-12-06	127.24	205.96	464.07		133.49	230.03	470.63
134.29	230.79	474.2		2018-05-12	127.62	206.95	464.7		134.67	229.84	473.5
131.94	227.96	470.7		2018-12-06	127.24	205.96	464.07		132.7	228	470.63
134.24	229.29	471.75		2018-05-12	127.62	206.95	464.7		134.62	228.34	471.05
134.67	232.35	474.21		2018-05-12	127.62	206.95	464.7		135.05	231.4	473.51
134.2	230.18	473.8		2018-12-06	127.24	205.96	464.07		134.96	230.22	473.73
133.03	231.83	473.2		2018-12-06	127.24	205.96	464.07		133.79	231.87	473.13
135.04	233.29	474.75		2018-05-12	127.62	206.95	464.7		135.42	232.34	474.05
131.23	227.67	469.74		2018-12-06	127.24	205.96	464.07		131.99	227.71	469.67
132.76	228.97	471.87		11/27/18	127.99	207.24	464.91		132.77	227.73	470.96
134.34	232.69	474.59		11/27/18	127.99	207.24	464.91		134.35	231.45	473.68
P=3 GPa rejected
132.3	223.85	471.87		2018-12-06	127.24	205.96	464.07		133.06	223.89	471.8
134.21	229.29	473.44		2018-12-06	127.24	205.96	464.07		134.97	229.33	473.37
132	233.71	473.82		2018-12-06	127.24	205.96	464.07		132.76	233.75	473.75
132.15	235.26	471.34		2018-12-06	127.24	205.96	464.07		132.91	235.3	471.27
132.86	225.58	472.41		2018-12-06	127.24	205.96	464.07		133.62	225.62	472.34
132.85	227.86	471.75		2018-12-06	127.24	205.96	464.07		133.61	227.9	471.68
134.36	234.51	474.45		2018-12-06	127.24	205.96	464.07		135.12	234.55	474.38
134.13	233.17	473.61		2018-12-06	127.24	205.96	464.07		134.89	233.21	473.54
Natural inclusions
Cisneros et al.										Gonzalez et al.
inclusions in garnet				inclusions in epidote
131.39	219.17	468.98								128.711	210.508	465.911
				131.14	220.16	468.79				129.548	211.922	466.167
				130.66	217.69	467.05				129.513	211.748	466.003
				131.33	217.64	467.98				129.106	211.498	466.246
				131.04	217.49	467.79				129.604	212.124	466.372
132.38	222.33	470.56								129.068	211.395	466.138
131.44	219.45	468.53								129.633	212.157	466.152
131.86	220.64	468.96								128.985	211.262	466.203
132.65	222.17	469.71								129.015	210.701	466.073
132.24	222.25	470								128.989	210.199	466.001
132.72	223.63	470.52								128.798	213.073	465.974
132.78	223.57	470.6								129.566	212.786	466.322
132.48	222.17	470.04								129.567	214.064	466.543
132.6	222.71	470.29								129.603	213.807	466.634
132.21	222.12	469.81								129.729	214.205	466.678
132.29	223.1	470.05								129.601	212.288	466.566
131.8	221.03	469.13								129.569	214.302	466.598
132.1	222.28	469.43								128.614	211.807	465.989
132.66	223.38	470.35								129.751	213.809	466.387
132.02	221.8	469.51								129.321	213.455	466.178
132.53	222.53	469.98								129.43	212.92	466.153
131.68	220.26	468.99								129.458	212.996	466.383
131.19	219.77	468.42								129.67	213.309	466.5
131.87	222.16	469.39								129.661	213.423	466.427
				131.39	218.38	468.45				129.444	213.656	466.544
				131.56	219.06	468.32				129.618	214.051	466.49
				131.37	220.15	468.85				129.649	213.36	466.448
				131.89	221.17	468.38				129.515	213.891	466.352
				131.54	217.8	468.06				129.582	213.023	466.713
				129.96	214.48	466.74				129.387	213.249	466.198
				130.18	213.62	466.8				129.574	212.118	466.081
132.86	223.95	470.75								128.792	212.232	466.084
131.99	221.02	469.23								129.547	212.987	466.391
				131.3	218.65	468.51				129.203	213.639	466.679
				132.34	222	469.7				128.568	209.631	465.687
				130.62	216.29	467.08				128.688	209.825	465.675
				132.06	222.41	469.88				129.504	216.101	466.522
										129.38	212.743	466.699
										129.257	211.942	466.555
										129.949	210.123	466.202
										129.261	211.457	466.283
										129.065	210.099	465.713
										130.011	211.739	466.42
										129.351	211.629	466.464
										129.09	211.191	466.039
										129.186	211.417	466.321
										129.105	211.253	466.441
										129.343	210.646	465.987
										129.475	212.411	466.609
										129.858	213.118	466.905
										129.517	212.698	466.755
										129.759	212.628	466.786
										130.093	214.678	467.518
										129.504	212.55	466.585
										128.832	209.473	465.739
										129.713	212.243	466.524
										129.281	210.213	466.122
										129.603	211.686	466.467
										128.924	208.462	466.122
										128.981	210.461	465.814
										129.16	210.445	465.861
										129.428	210.07	466.172
										129.083	210.501	466.279
										129.487	211.84	466.499
										129.351	212.01	466.618
										129.82	212.948	466.803
										129.199	211.491	466.314
										129.47	210.903	466.1
										128.889	209.092	465.308
										129.566	212.616	466.687
										129.022	210.428	465.914
										129.553	211.927	466.585
										129.224	210.903	466.085
										128.629	205.544	465.287
										129.325	210.582	465.691
										129.556	210.829	466.31
										129.565	212.363	466.785
										129.361	210.663	467.072
										128.792	209.883	465.591
										128.92	209.37	465.804
										128.966	209.375	465.548
										128.985	208.95	465.918
										128.724	208.263	465.21
										128.919	209.761	465.594
										129.394	211.582	466.714
										129.712	211.961	466.396
										129.968	211.863	466.469
										129.422	211.388	466.355
										128.956	210.659	466
										129.009	211.324	466.145
										129.346	211.492	466.407
										129.672	212.325	466.398

## Sheet: Calculation
Calculation of residual pressures P and stresses s from positions of the 128, 206, 464 peaks											in red rejected values based on inconsistent residual differential stresses (s128-s464)>1GPa
Natural inclusions			remeasured from Zhong et al. (2019)											Experimental inclusions			Bonazzi et al. (2019)
			128	206	464		P206	P128	P464	s128	s464						2.5 GPa 800°C
																	128	206	464		P206	P128	P464	s128	s464
			130.73	216.78	467.74		0.404884	0.38472	0.41137	-0.108055	-0.0319065
			131.45	219.03	469.4		0.502877	0.498853	0.601128	-0.0206616	-0.474822						133.03	226.57	471.28		0.865219	0.767845	0.821359	-0.448198	0.204863
			130.66	216.15	467.95		0.37828	0.373906	0.435132	-0.0236307	-0.279712						132.17	225.23	470.72		0.797003	0.618273	0.755167	-0.852309	0.196909
			129.87	216.61	467.95		0.397669	0.255324	0.435132	-0.786165	-0.184094						132.83	226.09	470.89		0.840594	0.732387	0.775208	-0.50279	0.306634
			129.62	217.71	467.98		0.444823	0.219124	0.438532	-1.24442	0.0308156						133.09	226.45	471.94		0.859043	0.778561	0.900015	-0.370167	-0.19059
			131.69	217.2	468.2		0.422822	0.538072	0.463512	0.596579	-0.199284						132.77	226.71	471.69		0.872442	0.72183	0.870139	-0.697576	0.0107229
			131.14	215.48	467.6		0.350388	0.449064	0.395568	0.527797	-0.223231						132.74	226.58	471.6		0.865735	0.716565	0.859408	-0.692201	0.0294865
			129.64	216.67	467.94		0.400212	0.221997	0.433999	-0.991437	-0.166013						132.85	223.45	470.64		0.708941	0.735915	0.745752	0.127943	-0.174233
			130.86	215.54	467.25		0.352869	0.404936	0.3562	0.28092	-0.0164952						132.98	225.89	471.54		0.830396	0.758942	0.852261	-0.33113	-0.102152
			130.02	218.13	468.24		0.463121	0.27735	0.468062	-1.00679	-0.0241325						133.12	225.5	471.39		0.810615	0.783933	0.83442	-0.123539	-0.111448
			130.3	214.28	466.88		0.301465	0.319079	0.314796	0.0979474	-0.0664134						132.67	225.28	470.8		0.799518	0.704315	0.764592	-0.447287	0.164275
																	132.64	224.94	470.8		0.782457	0.699081	0.764592	-0.393133	0.0841087
		mean value	130.636	216.587	467.915		0.397459	0.37233	0.43149	-0.143349	-0.16661						132.3	226.51	471.56		0.86213	0.640399	0.854643	-1.04251	0.0349093
		sdt error	0.214948	0.429527	0.211829		0.0182322	0.0331215	0.0240726	0.186928	0.0451399						132.23	224.36	470.99		0.753597	0.628464	0.787018	-0.599927	-0.157406
																	133.28	226.55	471.94		0.864189	0.81274	0.900015	-0.235192	-0.166604
																	132.45	225.36	471.02		0.803548	0.666143	0.790564	-0.649254	0.0609652
																	133.36	226.85	471.99		0.879682	0.827241	0.906002	-0.238631	-0.12225
			Cisneros et al. (2020)
																mean value	132.782	225.77	471.299		0.824694	0.72454	0.823822	-0.468494	0.00426193	before data rejection
			128	206	464		P206	P128	P464	s128	s464					sdt error	0.0902599	0.240775	0.117006		0.0121347	0.0158329	0.0138897	0.0720977	0.0393421
			131.39	219.17	468.98		0.509128	0.48914	0.5527	-0.102692	-0.211109					mean value	132.86	225.756	471.322		0.823998	0.73814	0.826525	-0.400077	-0.0116877	after data selection
			132.38	222.33	470.56		0.655026	0.6541	0.736347	-0.00449056	-0.38634					std error	0.0833106	0.267994	0.125681		0.0134991	0.0146763	0.014924	0.062247	0.0425724
			131.44	219.45	468.53		0.521685	0.497231	0.501127	-0.125132	0.0998442
			131.86	220.64	468.96		0.575856	0.566208	0.550401	-0.0482381	0.122847
			132.65	222.17	469.71		0.647418	0.700825	0.637053	0.257476	0.0495494						3 GPa 775°C
			132.24	222.25	470		0.651219	0.630166	0.6708	-0.102672	-0.0934051						128	206	464		P206	P128	P464	s128	s464
			132.72	223.63	470.52		0.717714	0.71306	0.731648	-0.0221263	-0.0659759
			132.78	223.57	470.6		0.714786	0.723587	0.741048	0.0417881	-0.124295						134.63	230.51	473.9		1.07537	1.06619	1.13771	-0.0392417	-0.282884
			132.48	222.17	470.04		0.647418	0.671319	0.675465	0.11581	-0.133784						134.4	231.13	474.36		1.10974	1.0217	1.19438	-0.377036	-0.382251
			132.6	222.71	470.29		0.673189	0.692116	0.704681	0.0909791	-0.14973						130.07	225.83	467.72		0.827343	0.284743	0.409111	-2.74214	2.00579
			132.21	222.12	469.81		0.645045	0.625063	0.648675	-0.0976416	-0.0173438						135.25	232.73	474.78		1.20006	1.18882	1.24643	-0.0465707	-0.207801
			132.29	223.1	470.05		0.691969	0.638691	0.676632	-0.257627	0.0729574						135.05	233	474.61		1.21554	1.14883	1.22533	-0.277107	-0.0438825
			131.8	221.03	469.13		0.593892	0.556244	0.569964	-0.187967	0.115224						133.49	230.03	470.63		1.049	0.850945	0.744576	-0.876229	1.41358
			132.1	222.28	469.43		0.652646	0.606431	0.604598	-0.22627	0.230075						134.67	229.84	473.5		1.03862	1.07398	1.0887	0.15181	-0.228278
			132.66	223.38	470.35		0.705538	0.70257	0.711708	-0.0141645	-0.0292695						132.7	228	470.63		0.93984	0.709559	0.744576	-1.05781	0.9122
			132.02	221.8	469.51		0.629914	0.592958	0.613858	-0.182103	0.0769466						134.62	228.34	471.05		0.957859	1.06424	0.794112	0.462481	0.762041
			132.53	222.53	469.98		0.664569	0.679967	0.668468	0.0742771	-0.0185891						135.05	231.4	473.51		1.12481	1.14883	1.08992	0.100942	0.158311
			131.68	220.26	468.99		0.558416	0.536426	0.55385	-0.110914	0.0220541						134.96	230.22	473.73		1.05941	1.13097	1.11685	0.304049	-0.261139
			131.19	219.77	468.42		0.536124	0.457028	0.488569	-0.406802	0.230929						133.79	231.87	473.13		1.15122	0.906303	1.0436	-1.06	0.488844
			131.87	222.16	469.39		0.646943	0.567872	0.599972	-0.390214	0.225059						135.42	232.34	474.05		1.17783	1.22313	1.15615	0.1873	0.0977378
			132.86	223.95	470.75		0.733383	0.73768	0.7587	0.0202931	-0.119571						131.99	227.71	469.67		0.924555	0.587923	0.632409	-1.58153	1.37485
			131.99	221.02	469.23		0.593428	0.587923	0.581492	-0.0273318	0.0574361						132.77	227.73	470.96		0.925607	0.72183	0.783473	-0.936215	0.663049
																	134.35	231.45	473.68		1.12761	1.01209	1.11072	-0.494189	0.0765428
		mean value	132.17	221.886	469.692		0.634787	0.619391	0.635353	-0.0775346	-0.00211315
		sdt error	0.102156	0.291242	0.145947		0.0136621	0.0172211	0.0169307	0.0338569	0.0326037					mean value	133.951	230.133	472.494		1.05653	0.946256	0.969878	-0.517593	0.409169
																sdt error	0.360389	0.521847	0.520895		0.0283792	0.064207	0.0621125	0.208791	0.179772
																mean value	134.84	231.096	473.717		1.10869	1.10788	1.11603	-0.00275628	-0.0311603
			Gonzalez et al. (2019)													std error	0.113637	0.451484	0.328119		0.0250253	0.022389	0.0397572	0.0966927	0.105568
			128	206	464		P206	P128	P464	s128	s464
			128.711	210.508	465.911		0.156324	0.092902	0.207366	-0.386845	-0.258528
			129.548	211.922	466.167		0.209205	0.208846	0.235593	-0.00209464	-0.13294
			129.513	211.748	466.003		0.202598	0.203854	0.217498	0.00735143	-0.0751839
			129.106	211.498	466.246		0.193155	0.146728	0.244324	-0.276398	-0.257913
			129.604	212.124	466.372		0.216909	0.216858	0.258272	-0.000297683	-0.207966
			129.068	211.395	466.138		0.189281	0.141481	0.23239	-0.285255	-0.21751
			129.633	212.157	466.152		0.218171	0.22102	0.233936	0.0165344	-0.0793805
			128.985	211.262	466.203		0.184293	0.130071	0.23957	-0.324986	-0.278868
			129.015	210.701	466.073		0.163433	0.134187	0.225216	-0.176057	-0.312413
			128.989	210.199	466.001		0.145013	0.130619	0.217277	-0.0871564	-0.366058
			128.798	213.073	465.974		0.253608	0.104621	0.214302	-0.883372	0.197718
			129.566	212.786	466.322		0.242422	0.211418	0.252734	-0.179333	-0.0517799
			129.567	214.064	466.543		0.292799	0.211532	0.277274	-0.464409	0.0775758
			129.603	213.807	466.634		0.282545	0.216686	0.287388	-0.376793	-0.0242026
			129.729	214.205	466.678		0.298451	0.234829	0.292283	-0.361049	0.0307785
			129.601	212.288	466.566		0.223177	0.216399	0.279829	-0.0393382	-0.284326
			129.569	214.302	466.598		0.30235	0.211818	0.283386	-0.516159	0.0946659
			128.614	211.807	465.989		0.20482	0.0799007	0.215988	-0.754982	-0.0563518
			129.751	213.809	466.387		0.282624	0.238014	0.259967	-0.253908	0.113417
			129.321	213.455	466.178		0.268598	0.176667	0.236841	-0.532989	0.159357
			129.43	212.92	466.153		0.24762	0.192039	0.234079	-0.322633	0.0680502
			129.458	212.996	466.383		0.250584	0.196007	0.259524	-0.31626	-0.044847
			129.67	213.309	466.5		0.262847	0.226313	0.2725	-0.209508	-0.0483422
			129.661	213.423	466.427		0.267336	0.225017	0.264401	-0.242498	0.0147022
			129.444	213.656	466.544		0.276548	0.194022	0.277386	-0.475472	-0.00418853
			129.618	214.051	466.49		0.292279	0.218837	0.27139	-0.418993	0.104424
			129.649	213.36	466.448		0.264854	0.223291	0.26673	-0.23841	-0.00939832
			129.515	213.891	466.352		0.28589	0.204111	0.25609	-0.468951	0.14918
			129.582	213.023	466.713		0.251638	0.213678	0.296179	-0.218953	-0.222889
			129.387	213.249	466.198		0.260489	0.18596	0.239051	-0.431931	0.107618
			129.574	212.118	466.081		0.216665	0.212533	0.226131	-0.024042	-0.0476994
			128.792	212.232	466.084		0.221029	0.103783	0.226462	-0.701051	-0.0273703
			129.547	212.987	466.391		0.250233	0.208674	0.260411	-0.240084	-0.0510547
			129.203	213.639	466.679		0.275874	0.160162	0.292395	-0.672499	-0.0825593
			128.568	209.631	465.687		0.124435	0.0737666	0.182786	-0.313441	-0.296663
			128.688	209.825	465.675		0.131425	0.0897752	0.18147	-0.255993	-0.254336
			129.504	216.101	466.522		0.376226	0.202528	0.274942	-0.975968	0.503479
			129.38	212.743	466.699		0.240737	0.184957	0.294621	-0.324916	-0.269858
			129.257	211.942	466.555		0.209951	0.167682	0.278607	-0.249206	-0.344898
			129.949	210.123	466.202		0.142229	0.26688	0.239493	0.729384	-0.49206
			129.261	211.457	466.283		0.191596	0.168241	0.248451	-0.138321	-0.286517
			129.065	210.099	465.713		0.141356	0.141024	0.185638	-0.00200665	-0.224839
			130.011	211.739	466.42		0.202242	0.276006	0.263625	0.424177	-0.308816
			129.351	211.629	466.464		0.198081	0.18087	0.268505	-0.101432	-0.354286
			129.09	211.191	466.039		0.181622	0.144474	0.221499	-0.221951	-0.20145
			129.186	211.417	466.321		0.190092	0.15778	0.252657	-0.191963	-0.315237
			129.105	211.253	466.441		0.183941	0.146547	0.265954	-0.223165	-0.413039
			129.343	210.646	465.987		0.161389	0.179744	0.215768	0.109234	-0.275183
			129.475	212.411	466.609		0.227905	0.198405	0.284609	-0.171798	-0.284404
			129.858	213.118	466.905		0.255353	0.253556	0.317586	-0.0102577	-0.310916
			129.517	212.698	466.755		0.238992	0.20438	0.300857	-0.200719	-0.309741
			129.759	212.628	466.786		0.236281	0.239157	0.304311	0.0165467	-0.340595
			130.093	214.678	467.518		0.317544	0.288136	0.386327	-0.16409	-0.340764
			129.504	212.55	466.585		0.233265	0.202528	0.281941	-0.178578	-0.244096
			128.832	209.473	465.739		0.118768	0.109179	0.188492	-0.0588225	-0.354488
			129.713	212.243	466.524		0.22145	0.2325	0.275164	0.0639106	-0.26969
			129.281	210.213	466.122		0.145509	0.17104	0.230656	0.152926	-0.430922
			129.603	211.686	466.467		0.200236	0.21667	0.268838	0.095931	-0.345063
			128.924	208.462	466.122		0.0830495	0.121687	0.230656	0.238568	-0.750161
			128.981	210.461	465.814		0.154583	0.12948	0.19673	-0.151662	-0.213654
			129.16	210.445	465.861		0.153996	0.154167	0.201898	0.00102913	-0.24275
			129.428	210.07	466.172		0.140302	0.19174	0.236178	0.306867	-0.485209
			129.083	210.501	466.279		0.156052	0.143507	0.248008	-0.0754734	-0.464521
			129.487	211.84	466.499		0.206073	0.20011	0.272389	-0.0348973	-0.333361
			129.351	212.01	466.618		0.212541	0.18087	0.285609	-0.185973	-0.366827
			129.82	212.948	466.803		0.248711	0.248017	0.306206	-0.00397298	-0.287581
			129.199	211.491	466.314		0.192876	0.159589	0.251882	-0.197519	-0.297267
			129.47	210.903	466.1		0.170896	0.197695	0.228228	0.158359	-0.289707
			128.889	209.092	465.308		0.105197	0.116919	0.141325	0.0720211	-0.184429
			129.566	212.616	466.687		0.235816	0.211373	0.293285	-0.141613	-0.28793
			129.022	210.428	465.914		0.153372	0.135106	0.207729	-0.110227	-0.275365
			129.553	211.927	466.585		0.20938	0.209515	0.281941	0.000791495	-0.364445
			129.224	210.903	466.085		0.170896	0.163073	0.226573	-0.0466408	-0.281373
			128.629	205.544	465.287		-0.0147699	0.0818859	0.139034	0.621447	-0.791766
			129.325	210.582	465.691		0.159031	0.177213	0.183225	0.108343	-0.122717
			129.556	210.829	466.31		0.168152	0.209944	0.251439	0.246363	-0.420293
			129.565	212.363	466.785		0.226058	0.21123	0.3042	-0.0861159	-0.39148
			129.361	210.663	467.072		0.162016	0.182278	0.336254	0.120486	-0.874776
			128.792	209.883	465.591		0.133522	0.103768	0.172262	-0.182057	-0.196981
			128.92	209.37	465.804		0.115086	0.121141	0.195632	0.0370611	-0.409412
			128.966	209.375	465.548		0.115265	0.127426	0.167553	0.0743001	-0.266277
			128.985	208.95	465.918		0.100173	0.130028	0.208169	0.183034	-0.549036
			128.724	208.263	465.21		0.0761295	0.0946064	0.130641	0.115182	-0.27903
			128.919	209.761	465.594		0.129115	0.121005	0.172591	-0.0494496	-0.221116
			129.394	211.582	466.714		0.196306	0.186933	0.296291	-0.055181	-0.502145
			129.712	211.961	466.396		0.210674	0.232356	0.260965	0.125742	-0.252914
			129.968	211.863	466.469		0.206946	0.269672	0.26906	0.360832	-0.312283
			129.422	211.388	466.355		0.189003	0.190891	0.256422	0.0111244	-0.339639
			128.956	210.659	466		0.161868	0.126058	0.2172	-0.216132	-0.27997
			129.009	211.324	466.145		0.186601	0.13332	0.233196	-0.318876	-0.235127
			129.346	211.492	466.407
			129.672	212.325	466.398
		mean value	129.338	211.715	466.278		0.202115	0.179016	0.247697	-0.135059	-0.229949
		sdt error	0.0358724	0.15355	0.0414001		0.00585782	0.00505891	0.00462691	0.0244452	0.0197854
